# Supplementary material
Source: PubMed Central journal article supplement (PMC3180901)
Supplement: NIHMS315657-supplement-1_si_001.pdf [file NIHMS315657-supplement-1_si_001.pdf]

# Supporting Information

## Experimental Evidence of Icosahedral and Decahedral Packing in One-Dimensional Nanostructures

J. Jesus Velázquez-Salazar,<sup>1</sup> Rodrigo Esparza,<sup>1</sup> Sergio Mejía-Rosales,<sup>3</sup> Rubén Estrada-Salas,<sup>1</sup> Arturo Ponce,<sup>1</sup> Francis Leonard Deepak,<sup>1,2</sup> Carlos Castro<sup>1</sup> and Miguel José-Yacamán<sup>1,\*</sup>

<sup>1</sup>Department of Physics and Astronomy, University of Texas at San Antonio, One UTSA Circle, San Antonio, Texas 78249, USA

<sup>2</sup>International Iberian Nanotechnology Laboratory, Avda Mestre Jose Veiga, Braga 4715, Portugal

<sup>3</sup>Center for Innovation and Research in Engineering and Technology, and CICEFIM-Facultad de Ciencias Físico-Matemáticas, Universidad Autónoma de Nuevo León, San Nicolás de los Garza, NL 66450, México

\*Corresponding author: [miguel.yacaman@utsa.edu](mailto:miguel.yacaman@utsa.edu), Phone: (210) 458-5451, Fax: (210) 458 4919

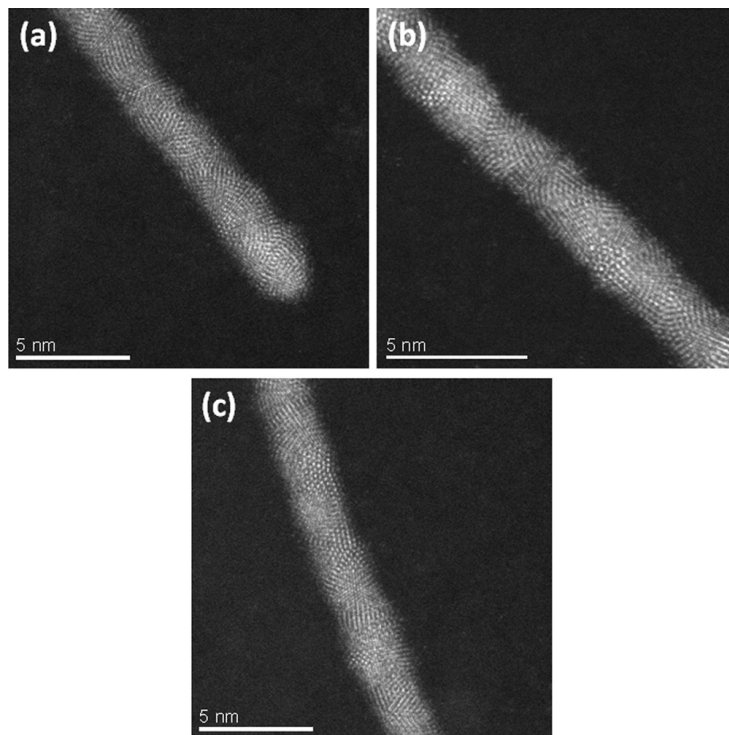

**Figure S1.** This figure show raw data of the HAADF-STEM images of icosahedral packing nanowires. The figures on the text were filtered to reduce the noise.

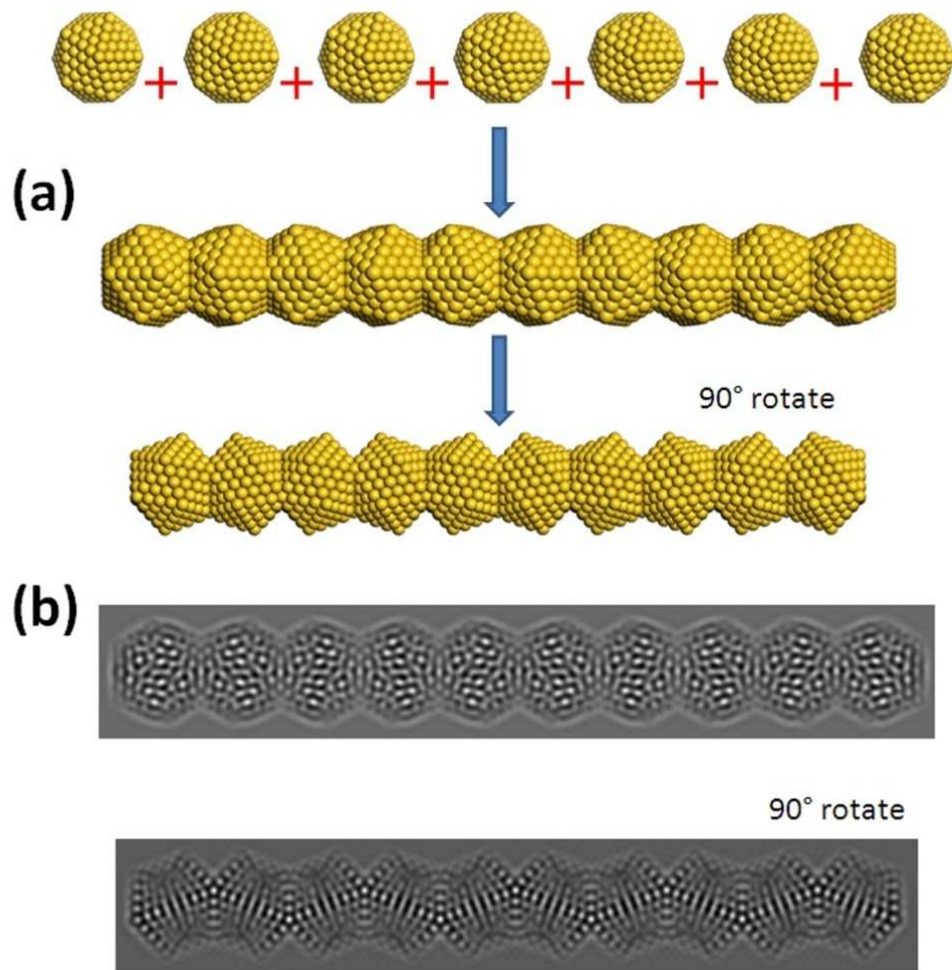

**Figure S2.** (a) Model of a nanowire obtained by stacking icosahedra by matching the (111) faces. This implies a rotation that eventually leads to a spiral structure. This however, do not reproduce the experimental observations as shown in the simulated TEM images (b) in which the “fan“ contrast observed on the experiments is not present.

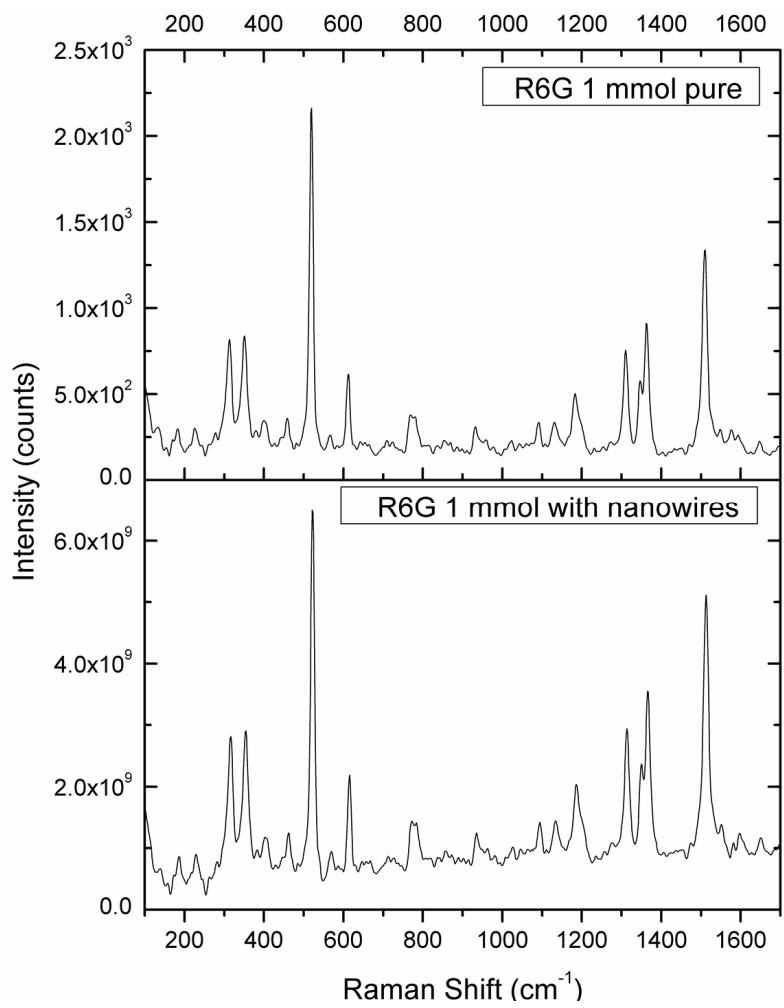

**Figure S3.** SERS spectra of standard rhodamine 6G (Rh6G) with Au/Ag nanowires compared with the same concentration of the rhodamine pure.

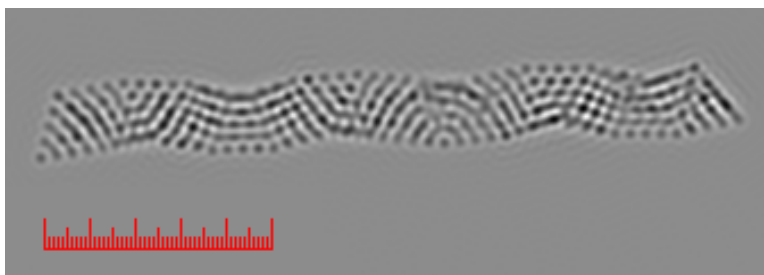

**Figure S4.** HRTEM image simulation (under optimum defocus condition) of an Ag/Au nanowire by using SimulaTEM software package (A. Gomez-Rodriguez, *et al. Ultramicroscopy* **110** (2010) 95-104), scale bar corresponds to 5 nm.
